# Supplementary material
Source: Research Square preprint supplement (doi:10.21203/rs.3.rs-9348446/v1)
Supplement: Supplementary file 1 [file 50594545b2a763f4d3ea2822.docx]

**Public awareness of modifiable dementia risk and protective factors among adults in Palestine: a cross sectional study**

**Tables**

**Table 1. Characteristics of the study participants (N = 836).**

| **Characteristic** | **Category** | **n (%)** |
| --- | --- | --- |
| **Sex** |  |  |
|  | Female | 664 (79.4) |
|  | Male | 172 (20.6) |
| **Age** |  |  |
|  | Mean (SD), years | 28.8 (11.4) |
|  | 18 to 29 years | 515 (61.6) |
|  | 30 to 39 years | 143 (17.1) |
|  | 40 to 49 years | 96 (11.5) |
|  | 50 to 59 years | 63 (7.5) |
|  | 60 years or older | 19 (2.3) |
| **Marital status** |  |  |
|  | Single | 398 (47.6) |
|  | Married | 407 (48.7) |
|  | Divorced or widowed | 31 (3.7) |
| **Education level** |  |  |
|  | College or university | 589 (70.5) |
|  | Graduate studies | 88 (10.5) |
|  | High school | 132 (15.8) |
|  | Preparatory | 20 (2.4) |
|  | Elementary | 3 (0.4) |
|  | Illiterate | 4 (0.5) |
| **Monthly income** |  |  |
|  | Low | 184 (22.0) |
|  | Middle | 351 (42.0) |
|  | Good | 264 (31.6) |
|  | High | 37 (4.4) |
| **Occupation** |  |  |
|  | None (unemployed or student) | 362 (43.3) |
|  | Non manual work | 240 (28.7) |
|  | Manual work | 193 (23.1) |
|  | Retired | 41 (4.9) |
| **Place of residence** |  |  |
|  | City | 355 (42.5) |
|  | Town or village | 481 (57.5) |
| **Contact with dementia patient** |  |  |
|  | Yes | 276 (33.0) |
|  | No or not sure | 560 (67.0) |

Values are presented as number (percentage) unless otherwise stated.

**Table 2. Dementia risk factor knowledge by participant characteristics.**

| **Characteristic** | **Category** | **N** | **Risk score (0 to 5)** | **Adequate (≥3)** | **p value** |
| --- | --- | --- | --- | --- | --- |
| **Sex** | Female | 664 | 2.48 ± 1.46 | 47.0% | 0.99 |
|  | Male | 172 | 2.48 ± 1.55 | 47.7% |  |
| **Age group** | Less than 40 years | 658 | 2.58 ± 1.52 | 50.3% | < 0.001 |
|  | 40 years or older | 178 | 2.11 ± 1.25 | 35.4% |  |
| **Education** | College degree or higher | 677 | 2.58 ± 1.49 | 50.2% | < 0.001 |
|  | High school or less | 159 | 2.08 ± 1.38 | 34.0% |  |
| **Marital status** | Single | 398 | 2.81 ± 1.52 | 56.3% | < 0.001 |
|  | Ever married | 438 | 2.19 ± 1.38 | 38.8% |  |
| **Residence** | City | 355 | 2.58 ± 1.51 | 49.6% | 0.09 |
|  | Town or village | 481 | 2.41 ± 1.46 | 45.3% |  |
| **Contact with dementia** | Yes | 276 | 2.51 ± 1.47 | 48.6% | 0.61 |
|  | No or not sure | 560 | 2.47 ± 1.49 | 46.4% |  |

Adequate risk factor knowledge was defined as identifying three or more correct risk factors. “Ever married” includes married, divorced, or widowed participants. p values were derived from independent samples t tests or chi square tests as appropriate.

**Table 3. Dementia protective factor knowledge by participant characteristics.**

| **Characteristic** | **Category** | **N** | **Protective score (0 to 5)** | **Adequate (≥3)** | **p value** |
| --- | --- | --- | --- | --- | --- |
| **Sex** | Female | 664 | 2.83 ± 1.34 | 65.1% | 0.044 |
|  | Male | 172 | 2.60 ± 1.37 | 56.4% |  |
| **Age group** | Less than 40 years | 658 | 2.83 ± 1.37 | 64.9% | 0.07 |
|  | 40 years or older | 178 | 2.61 ± 1.26 | 57.3% |  |
| **Education** | College degree or higher | 677 | 2.85 ± 1.33 | 64.7% | 0.003 |
|  | High school or less | 159 | 2.50 ± 1.40 | 57.2% |  |
| **Marital status** | Single | 398 | 3.01 ± 1.32 | 70.6% | < 0.001 |
|  | Ever married | 438 | 2.58 ± 1.34 | 56.6% |  |
| **Residence** | City | 355 | 2.87 ± 1.37 | 66.8% | 0.08 |
|  | Town or village | 481 | 2.72 ± 1.33 | 60.7% |  |
| **Contact with dementia** | Yes | 276 | 2.91 ± 1.30 | 68.1% | 0.05 |
|  | No or not sure | 560 | 2.73 ± 1.37 | 60.9% |  |

Adequate protective factor knowledge was defined as identifying three or more correct protective factors. “Ever married” includes married, divorced, or widowed participants. p values were derived from independent samples t tests or chi square tests as appropriate.

**Table 4. Multivariable logistic regression predicting adequate overall dementia knowledge.**

| **Predictor** | **Adjusted OR** | **95% CI** | **p value** |
| --- | --- | --- | --- |
| Female sex (vs male) | 0.96 | 0.67 to 1.38 | 0.83 |
| Age (per year increase) | 0.978 | 0.965 to 0.991 | 0.001 |
| College education or higher (vs high school or less) | 1.53 | 1.06 to 2.21 | 0.024 |
| Occupation: non manual job (vs not working) | 0.62 | 0.43 to 0.89 | 0.010 |
| Occupation: manual job (vs not working) | 0.67 | 0.46 to 0.98 | 0.040 |
| Occupation: retired (vs not working) | 0.56 | 0.28 to 0.90 | 0.096 |
| Contact with dementia patient (yes vs no) | 1.12 | 0.83 to 1.50 | 0.47 |
| Urban residence (city vs town or village) | 1.23 | 0.93 to 1.63 | 0.15 |

Outcome was adequate overall dementia knowledge, defined as a total score of 6 or more out of 10. The model adjusted for all variables listed in the table.
